# Supplementary material for: Identify devices and events from non-IP heterogeneous IoT network traffic
Source: PeerJ journal article supplement (doi:10.7717/peerj-cs.2363), 2024-10-16
Supplement: IoT_Identify_0803.zip [file IoT_Identify_0803.zip]

- dataset: 这个目录包含实验用到的原始抓包文件和经过处理后, 供模型使用的序列样本的缓存文件
  - CICIOT2022\_optAslabel\_zigbee: 从原始数据集中按类别分类的pcap文件
  - CICIOT2022\_optAslabel\_zwave: 从原始数据集中按类别分类的.zif文件, 经过zniffer工具转换后得到的csv文件
  - ZLeaks\_devtypeAsLabel\_zigbee: 从原始数据集中按提供的时间戳切割出来, 并按类别分类的pcap文件
  - Other: 是使用pcap2json\_dpkt\_cy.py和cy\_cut\_dataset.py处理后得到的序列样本的缓存文件
- dataset\_maker: 对应论文中将样本从Pcap文件处理为序列样本的过程
  - pcap2json\_config.py: 配置文件, 可用于指定目标数据集等参数
  - pcap2json\_dpkt\_cy.py: 将不同的流量文件转换为序列样本
  - cy\_cut\_dataset.py: 用于将完整的序列样本, 以不同的随机数切割数据集, 并保存到缓存文件
  - cy\_analysis\_dataset.py: 对生成为序列样本情况进行统计
- model: 实验使用的模型, 和论文中训练模型数据的备份
  - models\_compare.py: 用不同的序列网络构建模型, 并进行训练和测试
  - model\_tools.py: 一些和模型相关的常用函数
  - models\_eval.py: 将训练的结果收集起来
- share\_lib: 依赖的公共函数库
