# Supplementary material for: Identify devices and events from non-IP heterogeneous IoT network traffic
Source: PeerJ journal article supplement (doi:10.7717/peerj-cs.2363), 2024-10-16
Supplement: IoT_Identify_0803.zip [file IoT_Identify_0803.zip]

- **dataset**: This directory contains the original packet capture files used in the experiments and cached files of sequence samples.
  - **CICIOT2022\_optAslabel\_zigbee**: Pcap files classified by category from the original dataset.
  - **CICIOT2022\_optAslabel\_zwave**: Csv files classified by category from the original dataset. These files are obtained by converting zlf files using the zniffer tool.
  - **ZLeaks\_devtypeAsLabel\_zigbee**: Pcap files segmented by provided timestamps and classified by category from the original dataset.
  - **Other**: Cached files of sequence samples obtained after processing with pcap2json\_dpkt\_cy.py and cy\_cut\_dataset.py.
- **dataset\_maker**: Corresponds to the process of converting samples from Pcap files to sequence samples as described in the paper.
  - **pcap2json\_config.py**: Configuration file used to specify target datasets and other parameters.
  - **pcap2json\_dpkt\_cy.py**: Converts different traffic files into sequence samples.
  - **cy\_cut\_dataset.py**: Used to split sequence samples into datasets with different random numbers and save them to cached files.
  - **cy\_analysis\_dataset.py**: Statistics on the generation of sequence samples.
- **model**: Models used in the experiments, and backups of the data for training models in the paper.
  - **models\_compare.py**: Constructs models using different sequence networks and performs training and testing.
  - **model\_tools.py**: Some commonly used functions related to models.
  - **models\_eval.py**: Collects training results.
- **share\_lib**: Shared library of dependencies.
